# Supplementary material for: Established Microbial Colonies Can Survive Type VI Secretion Assault
Source: PubMed Central journal article supplement (PMC4619000; doi:10.1371/journal.pcbi.1004520), 2015-10-20
Supplement: pcbi.1004520.s019.pdf [file pcbi.1004520.s019.pdf]

**Table S1. Simulation geometries for range expansions.**

| Lattice         | Inoculum population | Inoculum radius |
|-----------------|---------------------|-----------------|
| 1D (linear)     | 500                 | 250             |
| 2D (triangular) | 469                 | 12              |
| 3D (cubic)      | 377                 | 6               |
