# Supplementary material for: Established Microbial Colonies Can Survive Type VI Secretion Assault
Source: PubMed Central journal article supplement (PMC4619000; doi:10.1371/journal.pcbi.1004520), 2015-10-20
Supplement: pcbi.1004520.s020.pdf [file pcbi.1004520.s020.pdf]

**Table S2. Simulation behavior definitions.**

| Name        | T6S- (sensitive)                                                                   | T6S+ (self-immune)                                                                                                                   |
|-------------|------------------------------------------------------------------------------------|--------------------------------------------------------------------------------------------------------------------------------------|
| attack      | Do nothing.                                                                        | With probability $\gamma$ , trigger the <b>be-attacked</b> behavior in one occupied neighbor (if one exists); otherwise, do nothing. |
| be-attacked | Die.                                                                               | Do nothing.                                                                                                                          |
| reproduce   | With probability $\alpha_s$ , divide into an adjacent space; otherwise do nothing. | With probability $\alpha_t$ , divide into an adjacent space; otherwise do nothing.                                                   |
