# Supplementary material for: Established Microbial Colonies Can Survive Type VI Secretion Assault
Source: PubMed Central journal article supplement (PMC4619000; doi:10.1371/journal.pcbi.1004520), 2015-10-20
Supplement: pcbi.1004520.s021.pdf [file pcbi.1004520.s021.pdf]

**Table S3. Parameter ranges for comparison of predicted to simulated rates of sensitive strain growth.**

|    | Attack rate ( $\tilde{\gamma}$ ) |     |      | Sensitive strain growth rate ( $\alpha_s$ ) |     |      | Inoculum radius ( $r_0$ ) |     |      |
|----|----------------------------------|-----|------|---------------------------------------------|-----|------|---------------------------|-----|------|
|    | min                              | max | step | min                                         | max | step | min                       | max | step |
| 1D | 1                                | 20  | 1    | 1                                           | 4   | 1    | 1                         | 20  | 1    |
| 2D | 0                                | 14  | 2    | 1                                           | 4   | 1    | 3                         | 11  | 2    |
| 3D | 0                                | 14  | 2    | 1                                           | 4   | 1    | 3                         | 11  | 2    |
