# Supplementary material for: Established Microbial Colonies Can Survive Type VI Secretion Assault
Source: PubMed Central journal article supplement (PMC4619000; doi:10.1371/journal.pcbi.1004520), 2015-10-20
Supplement: pcbi.1004520.s022.pdf [file pcbi.1004520.s022.pdf]

**Table S4. Active population growth rates for various division capacities.**

| Division capacity ( $K$ ) | Highest root of $\mu$ | Dominant eigenvalue of $\hat{L}$ |
|---------------------------|-----------------------|----------------------------------|
| 2                         | 0.618                 | 0.618                            |
| 3                         | 0.839                 | 0.839                            |
| 4                         | 0.928                 | 0.928                            |
| 5                         | 0.966                 | 0.966                            |
